# Supplementary material
Source: publisher figshare collection journal article supplement (https://gsajournals.figshare.com/ndownloader/files/28002720)
Supplement: Supplementary file 1 [file 28002720]

## Sheet: Table S7
Table S7: Information on the 254 genes identified by GWAS for virulence and host specificity with SNPS annotated as annotation as potential functional variants. The variants considered are 5' UTR premature start codon gain, missense variants in the coding region, start lost, and stop gain. Location in the B05.10 reference genome and various functional annotations are provided from https://fungidb…
		Number of SNPs / category
Trait	Gene_ID	5_prime_UTR_premature_start_codon_gain	missense	missense&splice	start_lost	stop_gained	Total	Genomic Location (Gene)	Gene_Name	Interpro Description	PFam Description	Smart Description	Superfamily Description	Computed GO Components	Computed GO Functions	Computed GO Processes	EC numbers from OrthoMCL
SpeVir	Bcin11g05860	1	1				16	bcin_chr_11:2,081,912..2,084,275(+)		Cytochrome P450;Cytochrome P450 superfamily	Cytochrome P450		Cytochrome P450 superfamily		heme binding;iron ion binding;oxidoreductase activity, acting on paired donors, with incorporation or reduction of molecular oxygen	oxidation-reduction process;pathogenesis	1.14.-.- (Acting on paired donors, with incorporation or reduction of molecular oxygen. The oxygen incorporated need not be derived from O(2).)
SpeVir	Bcin03g01060		3				5	bcin_chr_3:375,706..377,500(+)						integral component of membrane
SpeVir	Bcin06g04770		4				4	bcin_chr_6:1,623,193..1,624,375(+)						integral component of membrane
SpeVir	Bcin11g05830		1				3	bcin_chr_11:2,068,055..2,071,005(-)		Ferroportin-1;MFS transporter superfamily	Ferroportin-1		MFS transporter superfamily	integral component of membrane	iron ion transmembrane transporter activity	iron ion transmembrane transport
SpeVir	Bcin12g00340		1				2	bcin_chr_12:119,265..122,093(-)		Domain of unknown function DUF3533	Domain of unknown function DUF3533			integral component of membrane
SpeVir	Bcin07g05630		2				3	bcin_chr_7:2,083,408..2,086,571(+)		Zn(2)-C6 fungal-type DNA-binding domain;Zn(2)-C6 fungal-type DNA-binding domain superfamily			Zn(2)-C6 fungal-type DNA-binding domain superfamily	host cell nucleus;nucleus	DNA-binding transcription factor activity, RNA polymerase II-specific;zinc ion binding	regulation of transcription, DNA-templated
SpeVir	Bcin06g00028		2				4	bcin_chr_6:26,330..28,778(-)		Alkyl sulfatase dimerisation domain;Alkyl sulfatase, C-terminal;SCP2 sterol-binding domain superfamily;Ribonuclease Z/Hydroxyacylglutathione hydrolase-like	Alkyl sulfatase dimerisation domain;Alkyl sulfatase, C-terminal		SCP2 sterol-binding domain superfamily;Ribonuclease Z/Hydroxyacylglutathione hydrolase-like		protein dimerization activity		3.1.6.- (Sulfuric ester hydrolases.)
SpeVir	Bcin06g04620		1				2	bcin_chr_6:1,572,347..1,573,286(+)		F-box-like domain superfamily			F-box-like domain superfamily		protein binding
SpeVir	Bcin13g03190		1				1	bcin_chr_13:1,130,054..1,132,786(-)		Macro domain-like			Macro domain-like		phosphoprotein phosphatase activity
HostSpecif	Bcin03g03460		2				9	bcin_chr_3:1,170,098..1,173,057(+)		Tetracycline resistance protein/drug resistance transporter;Major facilitator superfamily;MFS transporter superfamily	Major facilitator superfamily		MFS transporter superfamily	integral component of membrane	transmembrane transporter activity	transmembrane transport
HostSpecif	Bcin01g01640		3				12	bcin_chr_1:634,259..637,112(-)		Tetracycline resistance protein/drug resistance transporter;Major facilitator superfamily;MFS transporter superfamily	Major facilitator superfamily		MFS transporter superfamily	integral component of membrane	transmembrane transporter activity	transmembrane transport
HostSpecif	Bcin09g06910		1				1	bcin_chr_9:2,446,078..2,449,574(+)		Membrane transport protein	Membrane transport protein			integral component of membrane		transmembrane transport
HostSpecif	Bcin12g00010		1				9	bcin_chr_12:5,086..7,100(+)		Cytochrome P450;Cytochrome P450, E-class, group I;Cytochrome P450, conserved site;Cytochrome P450 superfamily	Cytochrome P450		Cytochrome P450 superfamily	integral component of membrane	heme binding;iron ion binding;monooxygenase activity;oxidoreductase activity, acting on paired donors, with incorporation or reduction of molecular oxygen	oxidation-reduction process;pathogenesis	1.14.-.- (Acting on paired donors, with incorporation or reduction of molecular oxygen. The oxygen incorporated need not be derived from O(2).)
HostSpecif	Bcin15g02240		2			1	4	bcin_chr_15:772,176..775,157(+)		Cytochrome P450;Cytochrome P450, E-class, group I;Cytochrome P450, conserved site;Cytochrome P450 superfamily	Cytochrome P450		Cytochrome P450 superfamily	integral component of membrane	heme binding;iron ion binding;monooxygenase activity;oxidoreductase activity, acting on paired donors, with incorporation or reduction of molecular oxygen	oxidation-reduction process;pathogenesis	1.14.99.22 (Ecdysone 20-monooxygenase)
HostSpecif	Bcin02g01470		8				27	bcin_chr_2:585,860..590,753(+)		Ankyrin repeat;Ankyrin repeat-containing domain;Ankyrin repeat-containing domain superfamily	Ankyrin repeat-containing domain	Ankyrin repeat	Ankyrin repeat-containing domain superfamily	integral component of membrane	protein binding
HostSpecif	Bcin02g05670		1				2	bcin_chr_2:2,040,237..2,041,315(+)						integral component of membrane
HostSpecif	Bcin02g05680		1				1	bcin_chr_2:2,041,459..2,043,141(+)						integral component of membrane
HostSpecif	Bcin02g07320		2				2	bcin_chr_2:2,592,634..2,594,131(+)		RTA-like protein	RTA-like protein			integral component of membrane
HostSpecif	Bcin03g03030		1				2	bcin_chr_3:996,452..998,466(+)						integral component of membrane
HostSpecif	Bcin03g08840		1				1	bcin_chr_3:3,020,112..3,023,124(-)						integral component of membrane
HostSpecif	Bcin04g06140		1				6	bcin_chr_4:2,125,096..2,126,470(+)		Pyrroline-5-carboxylate reductase;6-phosphogluconate dehydrogenase-like, C-terminal domain superfamily;Pyrroline-5-carboxylate reductase, catalytic, N-terminal;Pyrroline-5-carboxylate reductase, dimerisation domain;NAD(P)-binding domain superfamily	Pyrroline-5-carboxylate reductase, catalytic, N-terminal;Pyrroline-5-carboxylate reductase, dimerisation domain		6-phosphogluconate dehydrogenase-like, C-terminal domain superfamily;NAD(P)-binding domain superfamily	integral component of membrane	pyrroline-5-carboxylate reductase activity	oxidation-reduction process;proline biosynthetic process	1.5.1.2 (Pyrroline-5-carboxylate reductase)
HostSpecif	Bcin04g06470		1				9	bcin_chr_4:2,229,701..2,231,226(-)						integral component of membrane
HostSpecif	Bcin05g00830		1				1	bcin_chr_5:339,395..341,101(-)		Protein of unknown function DUF3429	Protein of unknown function DUF3429			integral component of membrane
HostSpecif	Bcin05g00920		1				1	bcin_chr_5:375,362..376,804(+)						integral component of membrane
HostSpecif	Bcin06g05280		1				5	bcin_chr_6:1,806,397..1,807,254(-)						integral component of membrane			2.3.2.27 (RING-type E3 ubiquitin transferase)
HostSpecif	Bcin08g01250		1				4	bcin_chr_8:494,587..496,092(+)						integral component of membrane
HostSpecif	Bcin10g03740		3				10	bcin_chr_10:1,419,352..1,421,186(+)						integral component of membrane
HostSpecif	Bcin11g00620		1				1	bcin_chr_11:197,292..199,341(+)		Uncharacterized protein YOR389W-like				integral component of membrane
HostSpecif	Bcin13g01530		1				4	bcin_chr_13:566,465..567,963(-)						integral component of membrane
HostSpecif	Bcin14g02630		1				1	bcin_chr_14:1,039,557..1,040,580(+)						integral component of membrane
HostSpecif	Bcin15g00330		8				23	bcin_chr_15:147,529..150,766(+)						integral component of membrane
HostSpecif	Bcin01g02060	1					2	bcin_chr_1:794,352..795,795(-)		N-glycosylation protein EOS1	N-glycosylation protein EOS1			endoplasmic reticulum membrane;integral component of membrane		cellular response to oxidative stress
HostSpecif	Bcin12g00290		1				4	bcin_chr_12:104,849..106,740(+)	Bcshe9	Mitochondrial distribution and morphology family 33, fungi	Mitochondrial distribution and morphology family 33, fungi			integral component of membrane;mitochondrial inner membrane
HostSpecif	Bcin02g04440				1		2	bcin_chr_2:1,570,286..1,571,646(+)		Cellulose-binding domain, fungal;Cellulose-binding domain superfamily	Cellulose-binding domain, fungal	Cellulose-binding domain, fungal	Cellulose-binding domain superfamily	extracellular region	cellulose binding	carbohydrate metabolic process	3.2.1.4 (Cellulase)
HostSpecif	Bcin04g06210		2				4	bcin_chr_4:2,144,945..2,146,858(-)		Zn(2)-C6 fungal-type DNA-binding domain;Zn(2)-C6 fungal-type DNA-binding domain superfamily	Zn(2)-C6 fungal-type DNA-binding domain	Zn(2)-C6 fungal-type DNA-binding domain	Zn(2)-C6 fungal-type DNA-binding domain superfamily	host cell nucleus;nucleus	DNA-binding transcription factor activity, RNA polymerase II-specific;zinc ion binding	regulation of transcription, DNA-templated
HostSpecif	Bcin08g05360		1				1	bcin_chr_8:2,020,796..2,022,562(-)		Zn(2)-C6 fungal-type DNA-binding domain;Fungal transcription factor;Zn(2)-C6 fungal-type DNA-binding domain superfamily	Zn(2)-C6 fungal-type DNA-binding domain;Fungal transcription factor	Zn(2)-C6 fungal-type DNA-binding domain	Zn(2)-C6 fungal-type DNA-binding domain superfamily	host cell nucleus;nucleus	DNA-binding transcription factor activity, RNA polymerase II-specific;zinc ion binding	regulation of transcription, DNA-templated
HostSpecif	Bcin13g04090		1				1	bcin_chr_13:1,451,600..1,455,081(-)		Zn(2)-C6 fungal-type DNA-binding domain;Transcription factor domain, fungi;Zinc finger C2H2-type;Zinc finger C2H2 superfamily;Zn(2)-C6 fungal-type DNA-binding domain superfamily	Zn(2)-C6 fungal-type DNA-binding domain;Transcription factor domain, fungi	Zn(2)-C6 fungal-type DNA-binding domain;Zinc finger C2H2-type	Zinc finger C2H2 superfamily;Zn(2)-C6 fungal-type DNA-binding domain superfamily	host cell nucleus;nucleus	DNA binding;DNA-binding transcription factor activity, RNA polymerase II-specific;zinc ion binding	regulation of transcription, DNA-templated;transcription, DNA-templated
HostSpecif	Bcin07g05620		6				16	bcin_chr_7:2,067,988..2,083,240(+)	Bcmdn1	AAA+ ATPase domain;ATPase, dynein-related, AAA domain;Midasin;P-loop containing nucleoside triphosphate hydrolase;von Willebrand factor A-like domain superfamily;Midasin, AAA lid domain 7;Midasin AAA lid domain 5	ATPase, dynein-related, AAA domain;Midasin AAA lid domain 5;Midasin, AAA lid domain 7	AAA+ ATPase domain	P-loop containing nucleoside triphosphate hydrolase;von Willebrand factor A-like domain superfamily	chromosome;nucleus	ATP binding;ATPase activity	ribosomal large subunit assembly	3.6.4.2 (Transferred entry: 5.6.1.2)
HostSpecif	Bcin04g06170		1				2	bcin_chr_4:2,132,847..2,136,268(-)	Bcmlh3	MutL, C-terminal, dimerisation;DNA mismatch repair protein Mlh3;Histidine kinase/HSP90-like ATPase superfamily;MutL, C-terminal domain superfamily;DNA mismatch repair protein MutL/Mlh/Pms	MutL, C-terminal, dimerisation	MutL, C-terminal, dimerisation	MutL, C-terminal domain superfamily;Histidine kinase/HSP90-like ATPase superfamily	mismatch repair complex	ATP binding;ATPase activity	mismatch repair
HostSpecif	Bcin05g01540		1				1	bcin_chr_5:597,793..599,049(+)		SRA-YDG;PUA-like superfamily	SRA-YDG	SRA-YDG	PUA-like superfamily	nucleus
HostSpecif	Bcin08g05400		1				1	bcin_chr_8:2,028,222..2,029,737(+)		Chromosome segregation in meiosis protein 3;TIPIN/Csm3/Swi3	Chromosome segregation in meiosis protein 3			nucleus		DNA replication checkpoint;cell cycle;cellular response to DNA damage stimulus;replication fork protection
HostSpecif	Bcin01g08440		1				2	bcin_chr_1:2,947,899..2,950,632(+)	Bcmsd1	Aspartyl/Asparaginyl-tRNA synthetase, class IIb;Aminoacyl-tRNA synthetase, class II (D/K/N);Aspartate-tRNA ligase, type 1;Nucleic acid-binding, OB-fold	Aminoacyl-tRNA synthetase, class II (D/K/N)		Nucleic acid-binding, OB-fold	cytoplasm	ATP binding;aminoacyl-tRNA ligase activity;ligase activity;nucleotide binding	tRNA aminoacylation for protein translation	6.1.1.23 (Aspartate--tRNA(Asn) ligase)
HostSpecif	Bcin13g04720		1				2	bcin_chr_13:1,756,100..1,757,917(+)	Bcrrd1	Phosphotyrosyl phosphatase activator, PTPA;PTPA superfamily	Phosphotyrosyl phosphatase activator, PTPA		PTPA superfamily	cytoplasm	peptidyl-prolyl cis-trans isomerase activity;phosphatase activator activity		5.2.1.8 (Peptidylprolyl isomerase)
HostSpecif	Bcin01g07260		1				2	bcin_chr_1:2,532,368..2,534,621(+)		Glycoside hydrolase, family 43;Concanavalin A-like lectin/glucanase domain superfamily;Glycosyl hydrolase, five-bladed beta-propellor domain superfamily;Beta-xylosidase, C-terminal Concanavalin A-like domain	Glycoside hydrolase, family 43;Beta-xylosidase, C-terminal Concanavalin A-like domain		Concanavalin A-like lectin/glucanase domain superfamily;Glycosyl hydrolase, five-bladed beta-propellor domain superfamily		hydrolase activity, hydrolyzing O-glycosyl compounds	carbohydrate metabolic process	3.2.1.37 (Xylan 1,4-beta-xylosidase)
HostSpecif	Bcin03g04090		1				4	bcin_chr_3:1,365,475..1,368,253(-)		Carbohydrate kinase, FGGY;Glycerol kinase;Carbohydrate kinase, FGGY, conserved site;Carbohydrate kinase, FGGY, N-terminal;Carbohydrate kinase, FGGY, C-terminal;ATPase, nucleotide binding domain	Carbohydrate kinase, FGGY, N-terminal;Carbohydrate kinase, FGGY, C-terminal		ATPase, nucleotide binding domain		ATP binding;glycerol kinase activity;phosphotransferase activity, alcohol group as acceptor	carbohydrate metabolic process;glycerol catabolic process;glycerol-3-phosphate metabolic process	2.7.1.30 (Glycerol kinase)
HostSpecif	Bcin05g00450		1				1	bcin_chr_5:173,157..176,685(+)	Bckap120	Importin-beta, N-terminal domain;Armadillo-type fold	Importin-beta, N-terminal domain	Importin-beta, N-terminal domain	Armadillo-type fold		Ran GTPase binding	intracellular protein transport
HostSpecif	Bcin01g04870		1				8	bcin_chr_1:1,757,737..1,759,730(-)		NADH:flavin oxidoreductase/NADH oxidase, N-terminal	NADH:flavin oxidoreductase/NADH oxidase, N-terminal				FMN binding;catalytic activity;oxidoreductase activity	oxidation-reduction process	1.-.-.- (Oxidoreductases.)
HostSpecif	Bcin04g06240		1				2	bcin_chr_4:2,151,197..2,152,580(+)		Nitronate monooxygenase	Nitronate monooxygenase				catalytic activity;nitronate monooxygenase activity	oxidation-reduction process	1.13.11.32 (Transferred entry: 1.13.12.16)
HostSpecif	Bcin05g00440		1				8	bcin_chr_5:171,164..173,134(-)	Bcyim1	GroES-like superfamily;Alcohol dehydrogenase, N-terminal;Polyketide synthase, enoylreductase domain;NAD(P)-binding domain superfamily	Alcohol dehydrogenase, N-terminal	Polyketide synthase, enoylreductase domain	GroES-like superfamily;NAD(P)-binding domain superfamily		oxidoreductase activity	oxidation-reduction process	1.6.5.5 (NADPH:quinone reductase)
HostSpecif	Bcin10g03760		1				5	bcin_chr_10:1,422,908..1,426,756(+)	Bcinp51	Inositol polyphosphate-related phosphatase;Endonuclease/exonuclease/phosphatase superfamily		Inositol polyphosphate-related phosphatase	Endonuclease/exonuclease/phosphatase superfamily		hydrolase activity	phosphatidylinositol dephosphorylation	3.1.3.56 (Inositol-polyphosphate 5-phosphatase)
HostSpecif	Bcin12g00150		1				5	bcin_chr_12:66,501..68,304(+)		Protein kinase domain;Serine/threonine-protein kinase, active site;Protein kinase-like domain superfamily;Protein kinase, ATP binding site	Protein kinase domain	Protein kinase domain	Protein kinase-like domain superfamily		ATP binding;protein kinase activity;protein serine/threonine kinase activity	protein phosphorylation	2.7.11.21 (Polo kinase)
HostSpecif	Bcin09g06550		1				4	bcin_chr_9:2,315,575..2,317,871(+)		IBR domain;E3 ubiquitin ligase RBR family	IBR domain	IBR domain			metal ion binding;ubiquitin-protein transferase activity	protein ubiquitination	2.3.2.31 (RBR-type E3 ubiquitin transferase)
HostSpecif	Bcin02g07310		1				5	bcin_chr_2:2,589,236..2,590,879(-)	Bcap6	Aspartic peptidase A1 family;Aspartic peptidase, active site;Aspartic peptidase domain superfamily;Peptidase family A1 domain	Peptidase family A1 domain		Aspartic peptidase domain superfamily		aspartic-type endopeptidase activity	proteolysis	3.4.23.24 (Candidapepsin)
HostSpecif	Bcin08g05850		1				1	bcin_chr_8:2,179,341..2,181,042(-)	Bcpus4	Pseudouridine synthase II, N-terminal;tRNA pseudouridine synthase II, TruB;Pseudouridine synthase, catalytic domain superfamily	Pseudouridine synthase II, N-terminal		Pseudouridine synthase, catalytic domain superfamily		RNA binding;pseudouridine synthase activity	RNA modification;RNA processing;pseudouridine synthesis	5.4.99.25 (tRNA pseudouridine(55) synthase)
HostSpecif	Bcin01g01230		2				18	bcin_chr_1:494,692..497,022(+)	Bctrm1	tRNA methyltransferase, Trm1;S-adenosyl-L-methionine-dependent methyltransferase	tRNA methyltransferase, Trm1		S-adenosyl-L-methionine-dependent methyltransferase		RNA binding;tRNA (guanine-N2-)-methyltransferase activity;tRNA binding	tRNA processing	2.1.1.216 (tRNA (guanine(26)-N(2))-dimethyltransferase)
HostSpecif	Bcin08g05870		1				6	bcin_chr_8:2,184,735..2,187,474(+)		Six-hairpin glycosidase superfamily;Alpha-L-fucosidase;Glycosyl hydrolase family 95, N-terminal domain	Glycosyl hydrolase family 95, N-terminal domain		Six-hairpin glycosidase superfamily		alpha-L-fucosidase activity;catalytic activity		3.2.1.51 (Alpha-L-fucosidase)
HostSpecif	Bcin03g08530		1				1	bcin_chr_3:2,916,915..2,920,202(+)		ATPase, AAA-type, core;P-loop containing nucleoside triphosphate hydrolase	ATPase, AAA-type, core		P-loop containing nucleoside triphosphate hydrolase		ATP binding
HostSpecif	Bcin08g06640		3				6	bcin_chr_8:2,437,478..2,443,182(-)	Bchfm1	Helicase, C-terminal;Sec63 domain;DEAD/DEAH box helicase domain;Helicase superfamily 1/2, ATP-binding domain;P-loop containing nucleoside triphosphate hydrolase	DEAD/DEAH box helicase domain;Helicase, C-terminal;Sec63 domain	Helicase superfamily 1/2, ATP-binding domain;Helicase, C-terminal;Sec63 domain	P-loop containing nucleoside triphosphate hydrolase		ATP binding;hydrolase activity;nucleic acid binding		3.6.4.12 (DNA helicase)
HostSpecif	Bcin10g04360		1				2	bcin_chr_10:1,674,978..1,677,554(+)		Six-hairpin glycosidase superfamily;Beta-L-arabinofuranosidase, GH127	Beta-L-arabinofuranosidase, GH127		Six-hairpin glycosidase superfamily		catalytic activity
HostSpecif	Bcin12g00620		1				4	bcin_chr_12:217,872..220,123(+)		AMP-dependent synthetase/ligase	AMP-dependent synthetase/ligase				catalytic activity		2.7.1.12 (Gluconokinase)
HostSpecif	Bcin15g00920		1				1	bcin_chr_15:348,182..351,730(+)		AMP-dependent synthetase/ligase;Phosphopantetheine binding ACP domain;Male sterility, NAD-binding;AMP-binding, conserved site;NAD(P)-binding domain superfamily	AMP-dependent synthetase/ligase;Phosphopantetheine binding ACP domain;Male sterility, NAD-binding		NAD(P)-binding domain superfamily		catalytic activity		2.7.1.12 (Gluconokinase)
HostSpecif	Bcin15g00450		5				5	bcin_chr_15:185,836..191,202(-)		C-5 cytosine methyltransferase;DNA methylase, C-5 cytosine-specific, active site;S-adenosyl-L-methionine-dependent methyltransferase	C-5 cytosine methyltransferase		S-adenosyl-L-methionine-dependent methyltransferase		DNA (cytosine-5-)-methyltransferase activity;methyltransferase activity		2.1.1.37 (DNA (cytosine-5-)-methyltransferase)
HostSpecif	Bcin13g01980		1				1	bcin_chr_13:701,236..703,088(-)		FAD-binding domain;FAD/NAD(P)-binding domain superfamily	FAD-binding domain		FAD/NAD(P)-binding domain superfamily		FAD binding		1.14.13.1 (Salicylate 1-monooxygenase)
HostSpecif	Bcin15g05700		4				4	bcin_chr_15:2,017,521..2,020,068(-)		Carboxylesterase, type B;Carboxylesterase type B, active site;Alpha/Beta hydrolase fold	Carboxylesterase, type B		Alpha/Beta hydrolase fold		hydrolase activity		3.1.1.- (Carboxylic ester hydrolases.)
HostSpecif	Bcin11g05100		1				1	bcin_chr_11:1,825,598..1,827,107(-)							metal ion binding
HostSpecif	Bcin02g07270		1				1	bcin_chr_2:2,571,792..2,576,722(-)		WD40 repeat;NACHT nucleoside triphosphatase;Quinoprotein alcohol dehydrogenase-like superfamily;WD40 repeat, conserved site;G-protein beta WD-40 repeat;P-loop containing nucleoside triphosphate hydrolase	WD40 repeat;NACHT nucleoside triphosphatase	WD40 repeat	Quinoprotein alcohol dehydrogenase-like superfamily;P-loop containing nucleoside triphosphate hydrolase		protein binding		2.7.11.1 (Non-specific serine/threonine protein kinase)
HostSpecif	Bcin05g00960		1				3	bcin_chr_5:387,520..389,250(-)	Bcmak11	WD40 repeat;WD40-repeat-containing domain superfamily		WD40 repeat	WD40-repeat-containing domain superfamily		protein binding
HostSpecif	Bcin10g03110		1				1	bcin_chr_10:1,186,152..1,188,413(-)		RNA recognition motif domain;RNA-binding domain superfamily		RNA recognition motif domain	RNA-binding domain superfamily		RNA binding;nucleic acid binding
HostSpecif	Bcin01g01220		1				5	bcin_chr_1:489,210..493,923(-)		NACHT nucleoside triphosphatase;Domain of unknown function DUF676, lipase-like;P-loop containing nucleoside triphosphate hydrolase;Alpha/Beta hydrolase fold	Domain of unknown function DUF676, lipase-like;NACHT nucleoside triphosphatase		P-loop containing nucleoside triphosphate hydrolase;Alpha/Beta hydrolase fold				3.4.21.72 (IgA-specific serine endopeptidase)
HostSpecif	Bcin10g02210		1				1	bcin_chr_10:855,078..858,300(-)		Chromo/chromo shadow domain;Chromo-like domain superfamily;Chromo domain, conserved site;Chromo domain	Chromo domain	Chromo/chromo shadow domain	Chromo-like domain superfamily
HostSpecif	Bcin07g01310		2				7	bcin_chr_7:481,367..484,742(-)		Domain of unknown function DUF4210;Protein FAM214/SPAC3H8.04, C-terminal	Protein FAM214/SPAC3H8.04, C-terminal;Domain of unknown function DUF4210	Domain of unknown function DUF4210
HostSpecif	Bcin09g06510		1				1	bcin_chr_9:2,304,205..2,307,509(+)		Haem-degrading;Uncharacterised protein family UPF0303;GlcG-like domain superfamily	Haem-degrading		GlcG-like domain superfamily
HostSpecif	Bcin06g00024		2				12	bcin_chr_6:22,765..23,851(+)		Metallo-beta-lactamase;Ribonuclease Z/Hydroxyacylglutathione hydrolase-like	Metallo-beta-lactamase		Ribonuclease Z/Hydroxyacylglutathione hydrolase-like				3.-.-.- (Hydrolases.)
HostSpecif	Bcin08g07110			1			5	bcin_chr_8:2,598,524..2,601,933(+)		NACHT nucleoside triphosphatase;P-loop containing nucleoside triphosphate hydrolase	NACHT nucleoside triphosphatase		P-loop containing nucleoside triphosphate hydrolase				2.7.6.2 (Thiamine diphosphokinase)
HostSpecif	Bcin12g00160		1				7	bcin_chr_12:69,989..71,857(-)		NAD(P)-binding domain superfamily			NAD(P)-binding domain superfamily
HostSpecif	Bcin11g05670		3				22	bcin_chr_11:2,007,101..2,008,513(+)		Papain-like cysteine peptidase superfamily			Papain-like cysteine peptidase superfamily
HostSpecif	Bcin03g06740		1				9	bcin_chr_3:2,280,767..2,282,037(+)		Phosphatidylethanolamine-binding protein;Phosphatidylethanolamine-binding protein, eukaryotic;PEBP-like superfamily	Phosphatidylethanolamine-binding protein		PEBP-like superfamily
HostSpecif	Bcin05g00560		1				1	bcin_chr_5:212,497..213,659(+)		S-adenosyl-L-methionine-dependent methyltransferase			S-adenosyl-L-methionine-dependent methyltransferase				2.1.3.- (Carboxy- and carbamoyltransferases.)
HostSpecif	Bcin01g08460	1					4	bcin_chr_1:2,956,031..2,957,238(+)		Serine hydrolase FSH;Alpha/Beta hydrolase fold	Serine hydrolase FSH		Alpha/Beta hydrolase fold				3.1.2.- (Thiolester hydrolases.)
HostSpecif	Bcin02g05640		2				6	bcin_chr_2:2,034,634..2,037,029(+)		SKP1/BTB/POZ domain superfamily			SKP1/BTB/POZ domain superfamily
HostSpecif	Bcin03g06230		1				1	bcin_chr_3:2,082,664..2,086,228(+)		Wings apart-like protein, C-terminal;Wings apart-like protein	Wings apart-like protein, C-terminal
HostSpecif	Bcin09g06540		1				6	bcin_chr_9:2,313,004..2,314,484(-)		Xylose isomerase-like, TIM barrel domain;Xylose isomerase-like superfamily	Xylose isomerase-like, TIM barrel domain		Xylose isomerase-like superfamily				1.1.1.25 (Shikimate dehydrogenase)
HostSpecif	Bcin14g02780		2				5	bcin_chr_14:1,083,244..1,088,295(+)		Zinc finger CCHC domain-containing protein 10
HostSpecif	Bcin12g01210		1				9	bcin_chr_12:413,252..414,465(-)									1.3.1.74 (2-alkenal reductase (NAD(P)(+)))
HostSpecif	Bcin13g02560		1				2	bcin_chr_13:877,101..878,540(-)									1.3.1.74 (2-alkenal reductase (NAD(P)(+)))
HostSpecif	Bcin01g01660		1				1	bcin_chr_1:650,320..652,745(-)
HostSpecif	Bcin01g08450		1				3	bcin_chr_1:2,951,224..2,953,335(-)
HostSpecif	Bcin02g06010		1			1	4	bcin_chr_2:2,128,405..2,129,423(-)
HostSpecif	Bcin02g06120		1				6	bcin_chr_2:2,155,831..2,156,492(-)
HostSpecif	Bcin03g00490		1				1	bcin_chr_3:175,392..178,832(-)
HostSpecif	Bcin03g06750		2				5	bcin_chr_3:2,283,816..2,285,153(-)
HostSpecif	Bcin03g06760		1				4	bcin_chr_3:2,285,724..2,286,682(-)
HostSpecif	Bcin03g08900		2				2	bcin_chr_3:3,039,425..3,044,206(-)
HostSpecif	Bcin03g08940		1				1	bcin_chr_3:3,059,347..3,060,547(+)
HostSpecif	Bcin04g06160		1				2	bcin_chr_4:2,131,546..2,132,807(-)
HostSpecif	Bcin05g00550		1				3	bcin_chr_5:210,887..212,183(+)
HostSpecif	Bcin06g04790		2				3	bcin_chr_6:1,626,303..1,627,264(+)
HostSpecif	Bcin06g05310		1				4	bcin_chr_6:1,815,668..1,818,057(-)
HostSpecif	Bcin07g05600		3				23	bcin_chr_7:2,065,715..2,066,684(-)
HostSpecif	Bcin07g06830		1				3	bcin_chr_7:2,527,028..2,530,887(+)
HostSpecif	Bcin08g01240		1				2	bcin_chr_8:491,893..493,698(-)
HostSpecif	Bcin09g07120		5				7	bcin_chr_9:2,509,761..2,511,449(+)
HostSpecif	Bcin10g01670		5				31	bcin_chr_10:638,971..640,721(+)
HostSpecif	Bcin10g02730		1				1	bcin_chr_10:1,028,332..1,030,019(+)
HostSpecif	Bcin10g02740		2				4	bcin_chr_10:1,030,474..1,031,591(+)
HostSpecif	Bcin10g02750		1				3	bcin_chr_10:1,032,532..1,033,567(+)
HostSpecif	Bcin10g02760		1				13	bcin_chr_10:1,036,050..1,037,426(+)
HostSpecif	Bcin10g02780		3				10	bcin_chr_10:1,040,321..1,042,576(+)
HostSpecif	Bcin10g02800		2				9	bcin_chr_10:1,045,453..1,047,268(+)
HostSpecif	Bcin10g04750		2				2	bcin_chr_10:1,818,761..1,820,302(+)
HostSpecif	Bcin11g05880		4				8	bcin_chr_11:2,087,292..2,089,356(-)
HostSpecif	Bcin12g00400		1				1	bcin_chr_12:135,287..136,987(-)
HostSpecif	Bcin12g00460	1					4	bcin_chr_12:157,659..165,282(+)
HostSpecif	Bcin12g01110		1				1	bcin_chr_12:373,546..375,672(-)
HostSpecif	Bcin12g01140		4				9	bcin_chr_12:384,068..391,998(-)
HostSpecif	Bcin12g01200		1				5	bcin_chr_12:411,194..412,019(+)
HostSpecif	Bcin12g01430		1				1	bcin_chr_12:503,891..506,059(-)
HostSpecif	Bcin13g03030		2				7	bcin_chr_13:1,072,120..1,073,000(-)
HostSpecif	Bcin13g03930		1				4	bcin_chr_13:1,377,655..1,378,983(+)
HostSpecif	Bcin13g04230		1				2	bcin_chr_13:1,516,917..1,522,105(-)
HostSpecif	Bcin13g04620		1				4	bcin_chr_13:1,716,594..1,719,546(-)
HostSpecif	Bcin14g01050		1				18	bcin_chr_14:467,389..468,445(-)
HostSpecif	Bcin14g02860		1				2	bcin_chr_14:1,109,559..1,110,307(-)
HostSpecif	Bcin15g00420		4				6	bcin_chr_15:172,382..173,375(+)
HostSpecif	Bcin15g00710		2				6	bcin_chr_15:264,710..266,500(+)
HostSpecif	Bcin15g03500		1				1	bcin_chr_15:1,228,288..1,231,191(+)
HostSpecif	Bcin15g04090		1				1	bcin_chr_15:1,425,653..1,428,262(+)
Virulence	Bcin02g06110		2				3	bcin_chr_2:2,150,788..2,155,789(+)		ABC transporter-like;AAA+ ATPase domain;ABC transporter type 1, transmembrane domain;ABC transporter, conserved site;P-loop containing nucleoside triphosphate hydrolase;ABC transporter type 1, transmembrane domain superfamily	ABC transporter-like;ABC transporter type 1, transmembrane domain	AAA+ ATPase domain	P-loop containing nucleoside triphosphate hydrolase;ABC transporter type 1, transmembrane domain superfamily	integral component of membrane	ATP binding;ATPase activity;ATPase-coupled transmembrane transporter activity	transmembrane transport	1.3.1.74 (2-alkenal reductase (NAD(P)(+)))
Virulence	Bcin13g04870		1				1	bcin_chr_13:1,818,184..1,823,807(+)		ABC transporter-like;AAA+ ATPase domain;CDR ABC transporter;ABC-2 type transporter;P-loop containing nucleoside triphosphate hydrolase;ABC-transporter N-terminal domain;ATP-binding cassette transporter, PDR-like subfamily G, domain 2	ABC transporter-like;ABC-2 type transporter;CDR ABC transporter;ABC-transporter N-terminal domain	AAA+ ATPase domain	P-loop containing nucleoside triphosphate hydrolase	integral component of membrane;membrane	ATP binding;ATPase activity;ATPase-coupled transmembrane transporter activity	transmembrane transport	3.6.3.28 (Transferred entry: 7.3.2.2)
Virulence	Bcin10g01450		2				3	bcin_chr_10:554,517..556,961(+)		Major facilitator superfamily;MFS transporter superfamily	Major facilitator superfamily		MFS transporter superfamily	integral component of membrane	transmembrane transporter activity	transmembrane transport	2.7.1.4 (Fructokinase)
Virulence	Bcin01g04520		1				1	bcin_chr_1:1,648,469..1,649,906(-)						integral component of membrane
Virulence	Bcin04g01090		1				2	bcin_chr_4:434,741..439,937(-)		Ankyrin repeat;Ankyrin repeat-containing domain;Ankyrin repeat-containing domain superfamily	Ankyrin repeat;Ankyrin repeat-containing domain	Ankyrin repeat	Ankyrin repeat-containing domain superfamily	integral component of membrane	protein binding		3.4.21.72 (IgA-specific serine endopeptidase)
Virulence	Bcin05g02700		2				4	bcin_chr_5:984,053..985,957(+)		Protein of unknown function DUF3431	Protein of unknown function DUF3431			integral component of membrane
Virulence	Bcin05g06360		5				13	bcin_chr_5:2,187,236..2,189,300(+)		Galactose oxidase/kelch, beta-propeller			Galactose oxidase/kelch, beta-propeller	integral component of membrane	protein binding
Virulence	Bcin05g06470		1				1	bcin_chr_5:2,225,370..2,226,432(+)						integral component of membrane
Virulence	Bcin06g05080		1				1	bcin_chr_6:1,725,374..1,729,536(-)		Galactose oxidase/kelch, beta-propeller			Galactose oxidase/kelch, beta-propeller	integral component of membrane	protein binding
Virulence	Bcin06g07550		1				10	bcin_chr_6:2,662,775..2,664,575(-)						integral component of membrane
Virulence	Bcin08g00860		2				2	bcin_chr_8:355,772..358,708(-)	Bcubp1	Peptidase C19, ubiquitin carboxyl-terminal hydrolase;Ubiquitin specific protease, conserved site;Papain-like cysteine peptidase superfamily	Peptidase C19, ubiquitin carboxyl-terminal hydrolase		Papain-like cysteine peptidase superfamily	integral component of membrane		protein deubiquitination;ubiquitin-dependent protein catabolic process	3.4.19.12 (Ubiquitinyl hydrolase 1)
Virulence	Bcin08g06840		2				3	bcin_chr_8:2,517,524..2,520,218(-)		PLC-like phosphodiesterase, TIM beta/alpha-barrel domain superfamily			PLC-like phosphodiesterase, TIM beta/alpha-barrel domain superfamily	integral component of membrane	phosphoric diester hydrolase activity	lipid metabolic process
Virulence	Bcin09g05620		5				5	bcin_chr_9:1,961,518..1,962,700(+)						integral component of membrane
Virulence	Bcin09g05690		1				1	bcin_chr_9:1,988,849..1,990,665(+)						integral component of membrane
Virulence	Bcin13g02180		1				1	bcin_chr_13:763,593..765,068(+)						integral component of membrane
Virulence	Bcin13g05770		1				1	bcin_chr_13:2,178,258..2,181,059(+)		Domain of unknown function DUF1793;Domain of unknown function DUF4965;Domain of unknown function DUF4964;Domain of unknown function DUF5127	Domain of unknown function DUF1793;Domain of unknown function DUF4964;Domain of unknown function DUF4965;Domain of unknown function DUF5127			integral component of membrane			3.5.1.2 (Glutaminase)
Virulence	Bcin14g00420		1				1	bcin_chr_14:169,245..171,214(-)		Cysteine-rich secretory protein-related;CAP domain;Pry1-like, SCP domain;CAP superfamily	CAP domain	CAP domain	CAP superfamily	integral component of membrane
Virulence	Bcin14g00840		1				5	bcin_chr_14:368,611..370,346(-)	Bcnat2	Domain of unknown function DUF1279	Domain of unknown function DUF1279			integral component of membrane			2.3.1.88 (Transferred entry: 2.3.1.254, 2.3.1.255, 2.3.1.256, 2.3.1.257, 2.3.1.258and 2.3.1.259)
Virulence	Bcin14g05200		1				1	bcin_chr_14:1,987,140..1,988,794(-)						integral component of membrane
Virulence	Bcin16g01550		1				1	bcin_chr_16:642,323..647,184(+)		Immunoglobulin E-set;AMP-activated protein kinase, glycogen-binding domain	AMP-activated protein kinase, glycogen-binding domain		Immunoglobulin E-set	integral component of membrane
Virulence	Bcin02g08530		1				1	bcin_chr_2:3,034,534..3,036,558(+)	Bcvps4	AAA+ ATPase domain;ATPase, AAA-type, core;ATPase, AAA-type, conserved site;MIT;Vps4 oligomerisation, C-terminal;P-loop containing nucleoside triphosphate hydrolase;MIT domain superfamily	ATPase, AAA-type, core;MIT;Vps4 oligomerisation, C-terminal	AAA+ ATPase domain;MIT	MIT domain superfamily;P-loop containing nucleoside triphosphate hydrolase	membrane	ATP binding		3.6.4.6 (Vesicle-fusing ATPase)
Virulence	Bcin06g04560		7				16	bcin_chr_6:1,554,098..1,556,504(+)		Glycoside hydrolase family 47;Seven-hairpin glycosidases	Glycoside hydrolase family 47		Seven-hairpin glycosidases	membrane	calcium ion binding;catalytic activity;mannosyl-oligosaccharide 1,2-alpha-mannosidase activity	protein glycosylation	3.2.1.- (Glycosidases, i.e. enzymes hydrolyzing O- and S-glycosyl compounds.)
Virulence	Bcin13g00840		1				1	bcin_chr_13:318,575..320,324(+)		Saccharopine dehydrogenase, NADP binding domain;NAD(P)-binding domain superfamily	Saccharopine dehydrogenase, NADP binding domain		NAD(P)-binding domain superfamily	integral component of membrane	oxidoreductase activity	oxidation-reduction process	1.5.1.9 (Saccharopine dehydrogenase (NAD(+), L-glutamate-forming))
Virulence	Bcin02g03080		4				6	bcin_chr_2:1,110,073..1,111,344(-)		Succinate dehydrogenase/fumarate reductase type B, transmembrane subunit;Succinate dehydrogenase, cytochrome b556 subunit;Succinate dehydrogenase, cytochrome b subunit, conserved site;Fumarate reductase/succinate dehydrogenase, transmembrane subunit	Succinate dehydrogenase/fumarate reductase type B, transmembrane subunit		Fumarate reductase/succinate dehydrogenase, transmembrane subunit	integral component of membrane;membrane;succinate dehydrogenase complex	electron transfer activity;metal ion binding;oxidoreductase activity, acting on the CH-CH group of donors;succinate dehydrogenase activity	tricarboxylic acid cycle	1.3.5.1 (Succinate dehydrogenase (quinone))
Virulence	Bcin03g02070		1				1	bcin_chr_3:693,576..695,746(+)		Glucose-methanol-choline oxidoreductase, N-terminal;Glucose-methanol-choline oxidoreductase, C-terminal;Glucose-methanol-choline oxidoreductase;FAD/NAD(P)-binding domain superfamily	Glucose-methanol-choline oxidoreductase, N-terminal;Glucose-methanol-choline oxidoreductase, C-terminal		FAD/NAD(P)-binding domain superfamily		flavin adenine dinucleotide binding;oxidoreductase activity, acting on CH-OH group of donors	oxidation-reduction process	1.1.99.1 (Choline dehydrogenase)
Virulence	Bcin03g02080		1				1	bcin_chr_3:695,779..697,809(-)		Flavin monooxygenase FMO;Flavin monooxygenase-like;FAD/NAD(P)-binding domain superfamily	Flavin monooxygenase-like		FAD/NAD(P)-binding domain superfamily		N,N-dimethylaniline monooxygenase activity;NADP binding;flavin adenine dinucleotide binding	oxidation-reduction process	1.-.-.- (Oxidoreductases.)
Virulence	Bcin06g06520		1				1	bcin_chr_6:2,288,866..2,290,968(+)		FAD linked oxidase, N-terminal;FAD-binding, type PCMH-like superfamily	FAD linked oxidase, N-terminal		FAD-binding, type PCMH-like superfamily		FAD binding;flavin adenine dinucleotide binding;oxidoreductase activity	oxidation-reduction process	1.5.3.6 ((R)-6-hydroxynicotine oxidase)
Virulence	Bcin09g04570		1				1	bcin_chr_9:1,606,037..1,608,597(-)		Glucose-methanol-choline oxidoreductase, N-terminal;Glucose-methanol-choline oxidoreductase, C-terminal;Glucose-methanol-choline oxidoreductase;FAD/NAD(P)-binding domain superfamily	Glucose-methanol-choline oxidoreductase, N-terminal;Glucose-methanol-choline oxidoreductase, C-terminal		FAD/NAD(P)-binding domain superfamily		flavin adenine dinucleotide binding;oxidoreductase activity, acting on CH-OH group of donors	oxidation-reduction process	1.1.99.1 (Choline dehydrogenase)
Virulence	Bcin05g02710		1				1	bcin_chr_5:987,010..988,878(+)		Cytochrome P450;Cytochrome P450, E-class, CYP52;Cytochrome P450, conserved site;Cytochrome P450 superfamily	Cytochrome P450		Cytochrome P450 superfamily		heme binding;iron ion binding;oxidoreductase activity, acting on paired donors, with incorporation or reduction of molecular oxygen;oxidoreductase activity, acting on paired donors, with incorporation or reduction of molecular oxygen, reduced flavin or flavoprotein as one donor, and incorporation of	oxidation-reduction process;pathogenesis	2.3.1.- (Transferring groups other than amino-acyl groups.)
Virulence	Bcin08g05350		1				1	bcin_chr_8:2,019,677..2,020,784(+)		DeoC/FbaB/LacD aldolase;Deoxyribose-phosphate aldolase;Deoxyribose-phosphate aldolase type I	DeoC/FbaB/LacD aldolase	DeoC/FbaB/LacD aldolase		cytoplasm	catalytic activity;deoxyribose-phosphate aldolase activity;lyase activity	deoxyribonucleotide catabolic process;deoxyribose phosphate catabolic process	4.1.2.4 (Deoxyribose-phosphate aldolase)
Virulence	Bcin02g06050		1				2	bcin_chr_2:2,137,764..2,140,796(+)		RINT-1/Tip20	RINT-1/Tip20			endoplasmic reticulum		Golgi vesicle transport
Virulence	Bcin02g04450		1				1	bcin_chr_2:1,571,642..1,573,867(-)	Bcalg9	GPI mannosyltransferase;Alpha-1,2-mannosyltransferase ALG9-like	GPI mannosyltransferase			endoplasmic reticulum membrane;integral component of membrane	dol-P-Man:Man(6)GlcNAc(2)-PP-Dol alpha-1,2-mannosyltransferase activity;dol-P-Man:Man(8)GlcNAc(2)-PP-Dol alpha-1,2-mannosyltransferase activity;mannosyltransferase activity;transferase activity, transferring glycosyl groups	GPI anchor biosynthetic process;protein glycosylation	2.4.1.- (Hexosyltransferases.)
Virulence	Bcin01g10130		2				2	bcin_chr_1:3,535,852..3,538,316(-)	Bcdug2	ArgE/DapE/ACY1/CPG2/YscS, conserved site;Peptidase M20;Peptidase M20, dimerisation domain	Peptidase M20;Peptidase M20, dimerisation domain			extracellular region	hydrolase activity;peptidase activity		3.4.13.20 (Beta-Ala-His dipeptidase)
Virulence	Bcin09g01110		1				2	bcin_chr_9:409,026..412,107(+)		Cellulose-binding domain, fungal;Glycoside hydrolase, family 7;Concanavalin A-like lectin/glucanase domain superfamily	Glycoside hydrolase, family 7	Cellulose-binding domain, fungal	Concanavalin A-like lectin/glucanase domain superfamily	extracellular region	cellulose binding;hydrolase activity, hydrolyzing O-glycosyl compounds	carbohydrate metabolic process;cellulose catabolic process	3.2.1.- (Glycosidases, i.e. enzymes hydrolyzing O- and S-glycosyl compounds.)
Virulence	Bcin14g00850		3				6	bcin_chr_14:371,158..372,670(-)	Bcpg1	Glycoside hydrolase, family 28;Parallel beta-helix repeat;Pectin lyase fold/virulence factor	Glycoside hydrolase, family 28	Parallel beta-helix repeat	Pectin lyase fold/virulence factor	extracellular region	polygalacturonase activity	carbohydrate metabolic process;cell wall organization	3.2.1.15 (Endo-polygalacturonase)
Virulence	Bcin03g03530		1				1	bcin_chr_3:1,198,832..1,201,607(-)		Zn(2)-C6 fungal-type DNA-binding domain;Zn(2)-C6 fungal-type DNA-binding domain superfamily	Zn(2)-C6 fungal-type DNA-binding domain	Zn(2)-C6 fungal-type DNA-binding domain	Zn(2)-C6 fungal-type DNA-binding domain superfamily	host cell nucleus;nucleus	DNA-binding transcription factor activity, RNA polymerase II-specific;zinc ion binding	regulation of transcription, DNA-templated
Virulence	Bcin06g03820		1				1	bcin_chr_6:1,324,778..1,326,946(+)		Zn(2)-C6 fungal-type DNA-binding domain;Zn(2)-C6 fungal-type DNA-binding domain superfamily	Zn(2)-C6 fungal-type DNA-binding domain	Zn(2)-C6 fungal-type DNA-binding domain	Zn(2)-C6 fungal-type DNA-binding domain superfamily	host cell nucleus;nucleus	DNA-binding transcription factor activity, RNA polymerase II-specific;zinc ion binding	regulation of transcription, DNA-templated
Virulence	Bcin13g01430		3				5	bcin_chr_13:535,524..537,339(-)		Dehydrogenase, E1 component;Thiamin diphosphate-binding fold;2-oxoisovalerate dehydrogenase subunit alpha	Dehydrogenase, E1 component		Thiamin diphosphate-binding fold	mitochondrial matrix	3-methyl-2-oxobutanoate dehydrogenase (2-methylpropanoyl-transferring) activity;alpha-ketoacid dehydrogenase activity;oxidoreductase activity, acting on the aldehyde or oxo group of donors, disulfide as acceptor	branched-chain amino acid catabolic process	1.2.4.4 (3-methyl-2-oxobutanoate dehydrogenase (2-methylpropanoyl-transferring))
Virulence	Bcin01g07490		2				2	bcin_chr_1:2,609,189..2,610,767(+)		Ribosomal protein L50, mitochondria	Ribosomal protein L50, mitochondria			mitochondrion;ribosome
Virulence	Bcin02g06080		1				7	bcin_chr_2:2,144,706..2,145,695(-)		Ribosome-assembly protein 3, C-terminal	Ribosome-assembly protein 3, C-terminal			nucleolus
Virulence	Bcin09g02980		2				3	bcin_chr_9:1,068,768..1,075,756(+)		E3 ubiquitin-protein ligase substrate receptor Mms22	E3 ubiquitin-protein ligase substrate receptor Mms22			nucleus		DNA repair;cellular response to DNA damage stimulus;replication fork processing	3.6.4.3 (Transferred entry: 5.6.1.1)
Virulence	Bcin13g01660		4				4	bcin_chr_13:597,226..598,705(-)		Bromodomain;Acyl-CoA N-acyltransferase;Bromodomain-like superfamily;Histone acetyltransferase GCN5	Bromodomain	Bromodomain	Bromodomain-like superfamily;Acyl-CoA N-acyltransferase	nucleus	N-acetyltransferase activity;histone acetyltransferase activity;protein binding		2.3.1.48 (Histone acetyltransferase)
Virulence	Bcin04g00640		1				1	bcin_chr_4:237,643..246,603(+)	Bcpks20	Thioesterase;Phosphopantetheine attachment site;Phosphopantetheine binding ACP domain;Methyltransferase type 12;Polyketide synthase, ketoreductase domain;Beta-ketoacyl synthase, N-terminal;Beta-ketoacyl synthase, C-terminal;Acyl transferase;Acyl transferase/acyl hydrolase/lysophospholipase;Thiolase-like;Beta-ketoacyl synthase, active site;Polyketide synthase, acyl transferase domain;Polyketide sy…	Beta-ketoacyl synthase, N-terminal;Phosphopantetheine binding ACP domain;Acyl transferase;Thioesterase;Beta-ketoacyl synthase, C-terminal;Methyltransferase type 12;Polyketide synthase, ketoreductase domain;Polyketide synthase, dehydratase domain;Methyltransferase, fungal type, helix-turn-helix domain	Polyketide synthase, beta-ketoacyl synthase domain;Polyketide synthase, acyl transferase domain	ACP-like superfamily;NAD(P)-binding domain superfamily;Acyl transferase/acyl hydrolase/lysophospholipase;S-adenosyl-L-methionine-dependent methyltransferase;Alpha/Beta hydrolase fold;Thiolase-like		catalytic activity;hydrolase activity, acting on ester bonds;methyltransferase activity;transferase activity	biosynthetic process;methylation	2.3.1.- (Transferring groups other than amino-acyl groups.)
Virulence	Bcin05g03390		1				1	bcin_chr_5:1,236,387..1,238,325(-)		Glycoside hydrolase, family 5;Glycoside hydrolase superfamily	Glycoside hydrolase, family 5		Glycoside hydrolase superfamily		hydrolase activity, hydrolyzing O-glycosyl compounds	carbohydrate metabolic process	3.2.1.58 (Glucan 1,3-beta-glucosidase)
Virulence	Bcin13g00810		1				1	bcin_chr_13:312,302..314,342(+)	Bcdao3	FAD dependent oxidoreductase;D-amino acid oxidase, conserved site;D-amino-acid oxidase	FAD dependent oxidoreductase				D-amino-acid oxidase activity;FAD binding;oxidoreductase activity	D-amino acid metabolic process;oxidation-reduction process	1.4.3.3 (D-amino-acid oxidase)
Virulence	Bcin16g02730		4				13	bcin_chr_16:1,063,849..1,066,778(-)		Fungal lipase-like domain;Alpha/Beta hydrolase fold	Fungal lipase-like domain		Alpha/Beta hydrolase fold			lipid metabolic process
Virulence	Bcin03g03130		1				2	bcin_chr_3:1,034,294..1,039,101(+)		CWF11 family;P-loop containing nucleoside triphosphate hydrolase;Intron-binding protein aquarius, N-terminal;DNA2/NAM7 helicase, AAA domain;DNA2/NAM7 helicase-like, AAA domain	DNA2/NAM7 helicase, AAA domain;DNA2/NAM7 helicase-like, AAA domain;Intron-binding protein aquarius, N-terminal		P-loop containing nucleoside triphosphate hydrolase	U2-type spliceosomal complex;spliceosomal complex		mRNA cis splicing, via spliceosome;mRNA splicing, via spliceosome	3.4.21.72 (IgA-specific serine endopeptidase)
Virulence	Bcin15g00580		3				3	bcin_chr_15:225,083..227,972(+)	Bclox15741	Lipoxygenase;Lipoxygenase, C-terminal;Lipoxygenase, conserved site;Lipoxigenase, C-terminal domain superfamily	Lipoxygenase, C-terminal		Lipoxigenase, C-terminal domain superfamily		metal ion binding;oxidoreductase activity, acting on single donors with incorporation of molecular oxygen, incorporation of two atoms of oxygen	oxidation-reduction process	1.13.11.- (With incorporation of two atoms of oxygen.)
Virulence	Bcin03g06130		1				1	bcin_chr_3:2,060,150..2,062,856(+)	Bcsgv1	Protein kinase domain;Serine/threonine-protein kinase, active site;Protein kinase-like domain superfamily;Protein kinase, ATP binding site	Protein kinase domain	Protein kinase domain	Protein kinase-like domain superfamily		ATP binding;protein kinase activity	protein phosphorylation	2.7.11.23 ([RNA-polymerase]-subunit kinase)
Virulence	Bcin03g02030		1				5	bcin_chr_3:680,658..683,204(+)		Peptidase S10, serine carboxypeptidase;Alpha/Beta hydrolase fold;Serine carboxypeptidases, histidine active site	Peptidase S10, serine carboxypeptidase		Alpha/Beta hydrolase fold		serine-type carboxypeptidase activity	proteolysis	3.4.16.- (Serine-type carboxypeptidases.)
Virulence	Bcin03g00410		1				1	bcin_chr_3:131,434..133,647(-)		ATPase, AAA-type, core;P-loop containing nucleoside triphosphate hydrolase	ATPase, AAA-type, core		P-loop containing nucleoside triphosphate hydrolase		ATP binding		3.-.-.- (Hydrolases.)
Virulence	Bcin15g02690		1				1	bcin_chr_15:948,782..949,598(+)		Phenolic acid decarboxylase;Calycin	Phenolic acid decarboxylase		Calycin		carboxy-lyase activity
Virulence	Bcin06g04410		1				1	bcin_chr_6:1,506,448..1,510,697(-)		AMP-dependent synthetase/ligase;AMP-binding, conserved site;ACP-like superfamily	AMP-dependent synthetase/ligase		ACP-like superfamily		catalytic activity
Virulence	Bcin07g06990		1				1	bcin_chr_7:2,587,916..2,590,520(+)		Isochorismatase-like;Isochorismatase-like superfamily	Isochorismatase-like		Isochorismatase-like superfamily		catalytic activity		3.5.1.19 (Nicotinamidase)
Virulence	Bcin16g00800		1				11	bcin_chr_16:346,713..349,324(+)		Glycoside hydrolase family 71	Glycoside hydrolase family 71				hydrolase activity		3.2.1.- (Glycosidases, i.e. enzymes hydrolyzing O- and S-glycosyl compounds.)
Virulence	Bcin07g05100		1				1	bcin_chr_7:1,906,102..1,910,692(+)		Zinc finger, CCCH-type;Chromo/chromo shadow domain;Chromo-like domain superfamily;Chromo domain, conserved site;Chromo domain;Zinc finger, CCCH-type superfamily	Chromo domain	Chromo/chromo shadow domain;Zinc finger, CCCH-type	Chromo-like domain superfamily;Zinc finger, CCCH-type superfamily		metal ion binding
Virulence	Bcin07g04950		1				1	bcin_chr_7:1,782,474..1,784,804(-)		Questin oxidase-like	Questin oxidase-like				oxidoreductase activity		3.4.25.1 (Proteasome endopeptidase complex)
Virulence	Bcin01g03990		1				1	bcin_chr_1:1,469,473..1,470,824(-)		BTB/POZ domain;SKP1/BTB/POZ domain superfamily	BTB/POZ domain		SKP1/BTB/POZ domain superfamily		protein binding
Virulence	Bcin04g00930		3				4	bcin_chr_4:349,197..353,621(-)		Ankyrin repeat;Heterokaryon incompatibility;Ankyrin repeat-containing domain;Ankyrin repeat-containing domain superfamily	Heterokaryon incompatibility;Ankyrin repeat-containing domain	Ankyrin repeat	Ankyrin repeat-containing domain superfamily		protein binding
Virulence	Bcin04g01020		2				2	bcin_chr_4:403,358..407,303(-)		WD40 repeat;NACHT nucleoside triphosphatase;WD40 repeat, conserved site;G-protein beta WD-40 repeat;P-loop containing nucleoside triphosphate hydrolase;WD40-repeat-containing domain superfamily	WD40 repeat;NACHT nucleoside triphosphatase	WD40 repeat	WD40-repeat-containing domain superfamily;P-loop containing nucleoside triphosphate hydrolase		protein binding
Virulence	Bcin06g04490		1				1	bcin_chr_6:1,526,644..1,531,750(-)	Bckmt6	SET domain	SET domain	SET domain			protein binding		2.1.1.356 ([Histone H3]-lysine(27) N-trimethyltransferase)
Virulence	Bcin09g03820		1				1	bcin_chr_9:1,350,585..1,353,435(-)		SH3 domain;SH3-like domain superfamily	SH3 domain	SH3 domain	SH3-like domain superfamily		protein binding		3.2.1.14 (Chitinase)
Virulence	Bcin15g02750		2				2	bcin_chr_15:959,162..961,672(-)		Ankyrin repeat;Ankyrin repeat-containing domain superfamily	Ankyrin repeat	Ankyrin repeat	Ankyrin repeat-containing domain superfamily		protein binding
Virulence	Bcin16g03350		1				1	bcin_chr_16:1,262,595..1,264,775(-)		BTB/POZ domain;SKP1/BTB/POZ domain superfamily	BTB/POZ domain	BTB/POZ domain	SKP1/BTB/POZ domain superfamily		protein binding
Virulence	Bcin14g03140		1				5	bcin_chr_14:1,188,388..1,189,523(-)		Ribonuclease/ribotoxin			Ribonuclease/ribotoxin		RNA binding;ribonuclease activity
Virulence	Bcin02g05730		3	1			6	bcin_chr_2:2,055,285..2,057,667(-)		Amidase signature domain;Amidase signature (AS) superfamily	Amidase signature domain		Amidase signature (AS) superfamily				6.3.5.7 (Glutaminyl-tRNA synthase (glutamine-hydrolyzing))
Virulence	Bcin08g02470		3				4	bcin_chr_8:950,733..952,872(-)		Carboxylesterase, type B;Alpha/Beta hydrolase fold	Carboxylesterase, type B		Alpha/Beta hydrolase fold				3.1.1.- (Carboxylic ester hydrolases.)
Virulence	Bcin16g00850		1				4	bcin_chr_16:365,817..367,974(+)		CID domain;ENTH/VHS	CID domain	CID domain	ENTH/VHS
Virulence	Bcin08g06050		1				1	bcin_chr_8:2,262,478..2,265,343(+)		Clr5 domain	Clr5 domain
Virulence	Bcin06g05090		1				1	bcin_chr_6:1,729,652..1,731,209(+)		Dimeric alpha-beta barrel			Dimeric alpha-beta barrel
Virulence	Bcin09g06760		1				1	bcin_chr_9:2,387,588..2,389,029(-)		Helicase, C-terminal;P-loop containing nucleoside triphosphate hydrolase		Helicase, C-terminal	P-loop containing nucleoside triphosphate hydrolase				3.6.4.12 (DNA helicase)
Virulence	Bcin14g03600	1					1	bcin_chr_14:1,371,045..1,373,299(+)		Oxysterol-binding protein;Oxysterol-binding protein, conserved site;Oxysterol-binding protein superfamily	Oxysterol-binding protein		Oxysterol-binding protein superfamily
Virulence	Bcin02g04600		1				1	bcin_chr_2:1,653,056..1,654,283(+)		Protein of unknown function DUF1349	Protein of unknown function DUF1349
Virulence	Bcin10g00660		1				1	bcin_chr_10:284,084..288,459(+)		Protein of unknown function DUF2841	Protein of unknown function DUF2841
Virulence	Bcin05g02540		2				3	bcin_chr_5:932,635..934,685(+)		S-adenosyl-L-methionine-dependent methyltransferase			S-adenosyl-L-methionine-dependent methyltransferase				2.1.1.163 (Demethylmenaquinone methyltransferase)
Virulence	Bcin07g07010		1				1	bcin_chr_7:2,592,990..2,594,012(-)		Zinc finger, RING-type	Zinc finger, RING-type
Virulence	Bcin07g01880		1				1	bcin_chr_7:703,545..708,747(-)									1.3.1.74 (2-alkenal reductase (NAD(P)(+)))
Virulence	Bcin08g05370		1				1	bcin_chr_8:2,023,170..2,024,766(-)									2.3.2.27 (RING-type E3 ubiquitin transferase)
Virulence	Bcin06g02740		1				1	bcin_chr_6:933,964..934,932(-)									2.7.1.12 (Gluconokinase)
Virulence	Bcin01g01130		1				1	bcin_chr_1:458,698..460,227(+)
Virulence	Bcin01g04150		1				1	bcin_chr_1:1,513,672..1,516,094(+)
Virulence	Bcin02g08660		1				1	bcin_chr_2:3,071,650..3,072,259(-)
Virulence	Bcin03g00530		1				1	bcin_chr_3:194,751..196,495(+)
Virulence	Bcin03g02850		1				1	bcin_chr_3:945,143..948,576(+)
Virulence	Bcin03g03540		1				6	bcin_chr_3:1,201,636..1,204,506(+)
Virulence	Bcin03g08390		1				1	bcin_chr_3:2,877,422..2,878,401(-)
Virulence	Bcin03g08550		1				1	bcin_chr_3:2,923,062..2,923,812(-)
Virulence	Bcin04g00480		1				1	bcin_chr_4:179,022..180,306(-)
Virulence	Bcin04g01010		1				3	bcin_chr_4:400,780..401,578(+)
Virulence	Bcin04g02830		1				1	bcin_chr_4:1,005,594..1,007,345(-)
Virulence	Bcin04g02900		1				1	bcin_chr_4:1,045,567..1,047,037(+)
Virulence	Bcin05g02560		1	1			2	bcin_chr_5:938,593..940,957(-)
Virulence	Bcin05g02750						2
Virulence	Bcin05g03700		1				1	bcin_chr_5:1,338,492..1,342,145(-)
Virulence	Bcin05g05340		1				1	bcin_chr_5:1,891,629..1,892,993(+)
Virulence	Bcin05g05510		2				2	bcin_chr_5:1,934,856..1,935,491(-)
Virulence	Bcin06g00880		1				3	bcin_chr_6:338,839..340,383(-)
Virulence	Bcin06g01210		1				1	bcin_chr_6:439,869..443,698(+)
Virulence	Bcin06g01880		1				1	bcin_chr_6:652,106..653,343(-)
Virulence	Bcin06g03620		2				2	bcin_chr_6:1,270,330..1,272,073(+)
Virulence	Bcin06g05100		2				2	bcin_chr_6:1,731,286..1,734,947(-)
Virulence	Bcin07g00350		1				1	bcin_chr_7:121,949..123,820(+)
Virulence	Bcin07g00360		1				3	bcin_chr_7:124,465..125,148(+)
Virulence	Bcin07g00780		3				3	bcin_chr_7:288,700..289,874(-)
Virulence	Bcin07g05460		1				1	bcin_chr_7:2,008,797..2,010,513(-)
Virulence	Bcin07g07050		1				1	bcin_chr_7:2,599,768..2,601,182(-)
Virulence	Bcin08g06720		2				3	bcin_chr_8:2,472,546..2,474,109(+)
Virulence	Bcin09g02620		5				8	bcin_chr_9:941,967..946,990(-)
Virulence	Bcin09g03300		1				1	bcin_chr_9:1,183,884..1,185,056(+)
Virulence	Bcin09g06460		1				1	bcin_chr_9:2,288,512..2,289,498(-)
Virulence	Bcin10g01010		1				1	bcin_chr_10:412,967..414,735(+)
Virulence	Bcin10g01850		1				2	bcin_chr_10:735,161..737,875(+)
Virulence	Bcin10g04730		2				2	bcin_chr_10:1,813,210..1,814,667(+)
Virulence	Bcin10g04790		1				1	bcin_chr_10:1,828,533..1,830,855(+)
Virulence	Bcin10g05080		2				2	bcin_chr_10:1,917,478..1,921,484(-)
Virulence	Bcin11g02470		1				2	bcin_chr_11:843,109..844,243(-)
Virulence	Bcin13g00470		1				1	bcin_chr_13:189,679..192,408(-)
Virulence	Bcin13g02190		1				3	bcin_chr_13:767,628..770,875(+)
Virulence	Bcin13g05060		1				1	bcin_chr_13:1,902,365..1,903,443(-)
Virulence	Bcin13g05600		1				3	bcin_chr_13:2,134,222..2,136,143(+)
Virulence	Bcin13g05680	1					1	bcin_chr_13:2,155,623..2,156,555(-)
Virulence	Bcin14g03080		1				1	bcin_chr_14:1,166,892..1,169,114(+)
Virulence	Bcin14g03130		1				13	bcin_chr_14:1,181,572..1,184,047(+)
Virulence	Bcin14g03570		2				2	bcin_chr_14:1,363,015..1,366,015(+)
Virulence	Bcin14g03580		1				1	bcin_chr_14:1,366,190..1,368,259(-)
Virulence	Bcin16g00890		2				3	bcin_chr_16:375,523..376,029(-)
